# Supplementary material
Source: Royal Society of Chemistry journal article supplement (doi:10.1039/d6ce00267f)
Supplement: d6ce00267f1.pdf [file d6ce00267f1.pdf]

## Electronic supplementary information

for

# Regioisomer-directed structural diversity in one-dimensional silver(I) coordination polymers

Seohyeon Yun,<sup>a</sup> Hankyeol Park,<sup>a</sup> Jaejun Lee,<sup>a</sup> Hyeonji Jang,<sup>a</sup> In-Hyeok Park,<sup>c</sup> and Eunji Lee\*<sup>a,b</sup>

<sup>a</sup> *Department of Chemistry(Gangneung), Kangwon National University, Gangneung 24547, S. Korea.*

<sup>b</sup> *Department of Chemistry and Advanced Materials, Kangwon National University, Gangneung 24547, S. Korea.*

<sup>c</sup> *Graduate School of Analytical Science and Technology (GRAST), Chungnam National University, Daejeon 34134, S. Korea.*

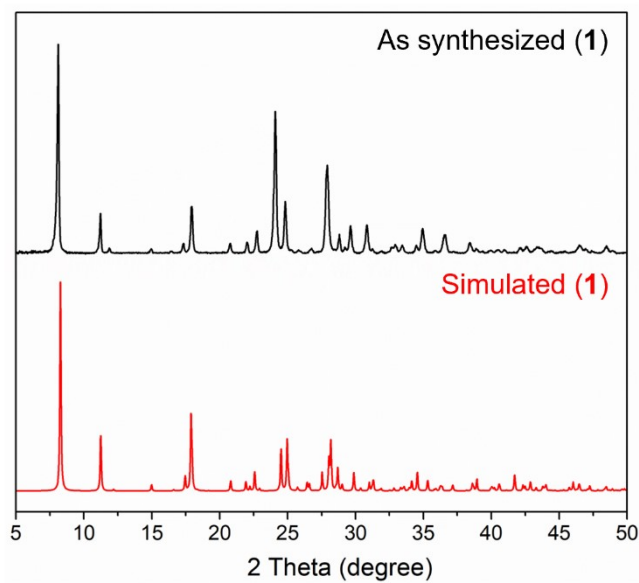

(a)

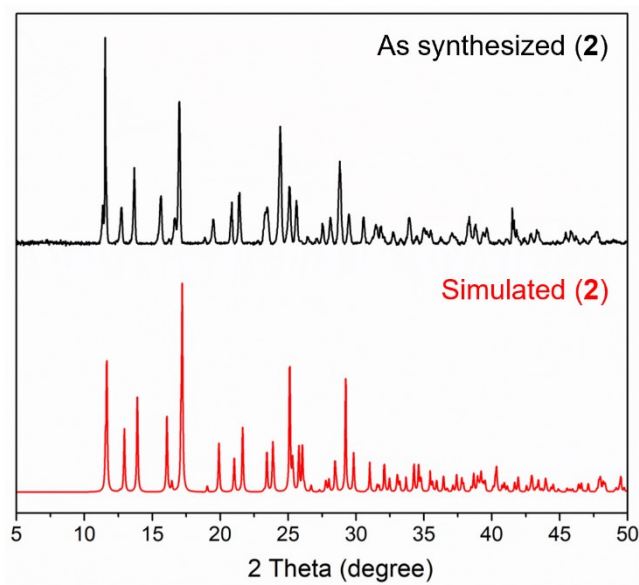

(b)

**Fig. S1** Comparison of PXRd patterns for (a) **1** and (b) **2**: (top) as synthesized and (bottom) simulated from the single crystal X-ray data.

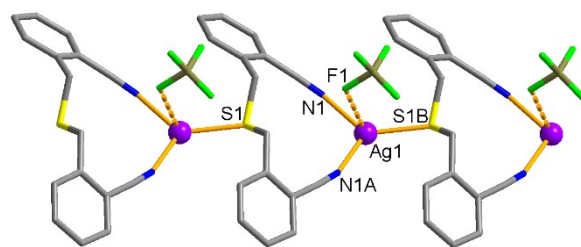

(a)

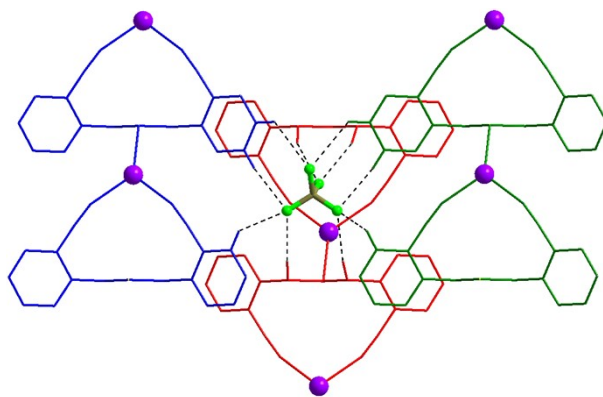

(b)

**Fig. S2** Crystal structure of **1**,  $[\text{Ag}(o\text{-L})\text{BF}_4]_n$  showing non-coordinated anions with weak  $\text{Ag}\cdots\text{F}$  interactions ( $\text{Ag1}\cdots\text{F1} = 3.004 \text{ \AA}$ ) and (b) Partial packing view of **1** showing multiple  $\text{C-H}\cdots\text{F}$  H-bonds ( $\text{H}\cdots\text{F} = 2.299\text{--}2.782 \text{ \AA}$ ).

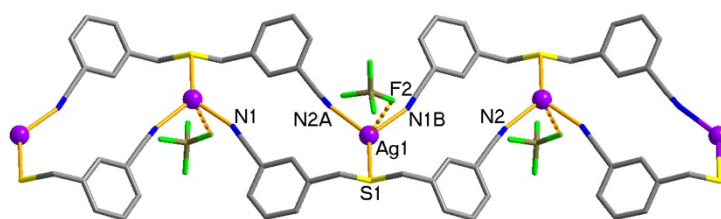

(a)

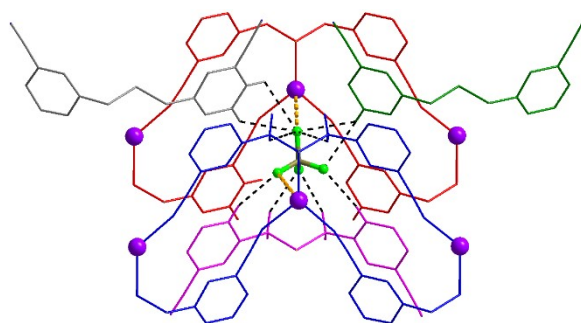

(b)

**Fig. S3** (a) Crystal structure of **2**,  $[\text{Ag}(m\text{-L})\text{BF}_4]_n$  showing non-coordinated anions with weak  $\text{Ag}\cdots\text{F}$  interactions ( $\text{Ag1}\cdots\text{F2} = 3.123 \text{ \AA}$ ) and (b) Partial packing view of **2** showing multiple  $\text{C-H}\cdots\text{F}$  H-bonds ( $\text{H}\cdots\text{F} = 2.424\text{--}2.981 \text{ \AA}$ )

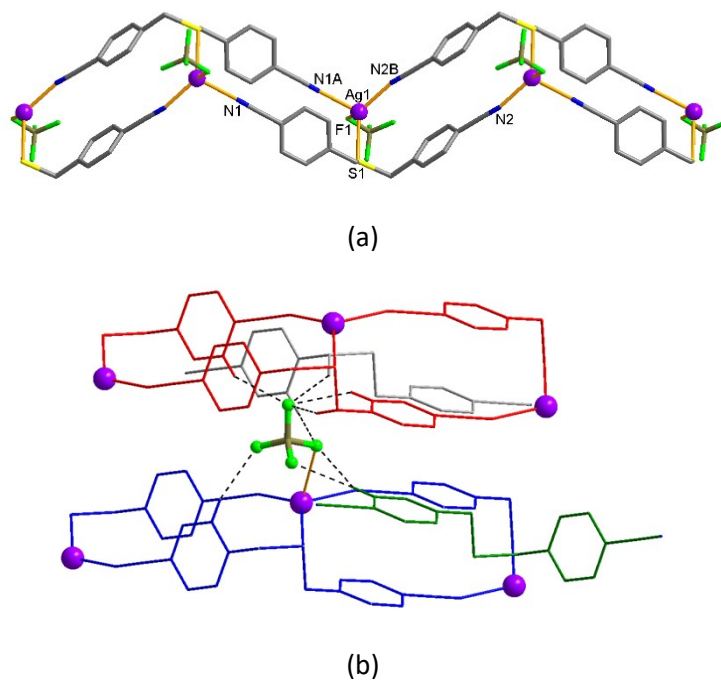

**Fig. S4** (a) Crystal structure of **3**  $[\text{Ag}(p\text{-L})\text{BF}_4]_n$  showing non-coordinated anions with weak Ag–F bond distance (Ag1–F1 = 2.654(2) Å) and (b) Partial packing view of **3** showing multiple C–H $\cdots$ F H-bonds (H $\cdots$ F = 2.397–2.638 Å).

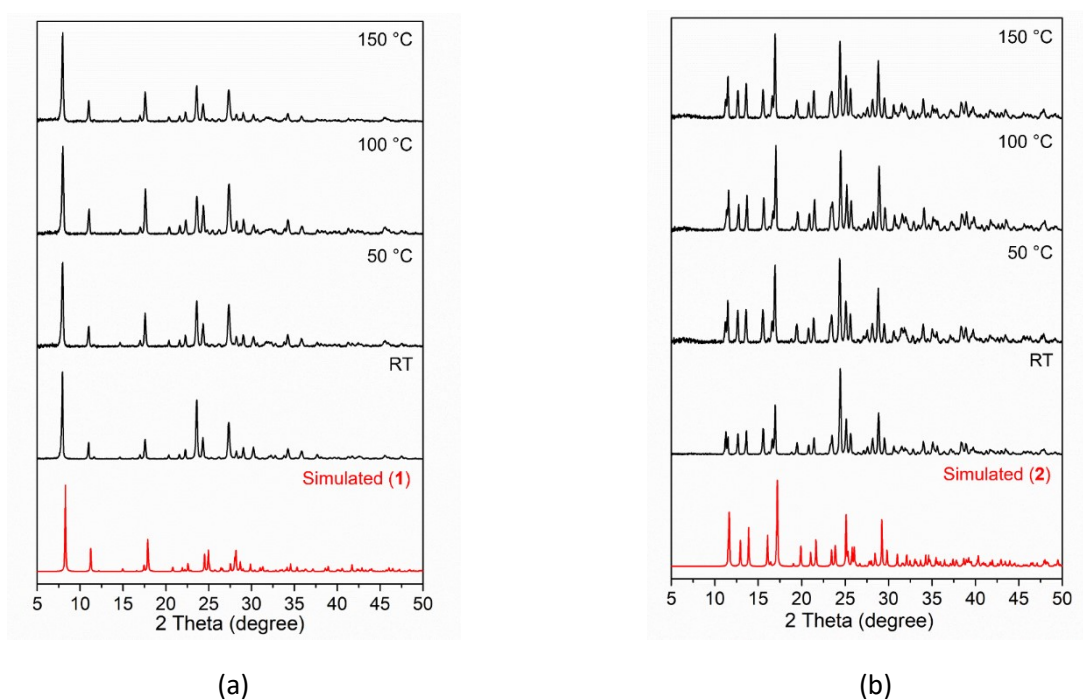

**Fig. S5** Variable-temperature PXRD patterns of (a) complex **1** ( $[\text{Ag}(o\text{-L})\text{BF}_4]_n$ ) and (b) complex **2** ( $[\text{Ag}(m\text{-L})\text{BF}_4]_n$ ) measured at room temperature after heating at 50, 100, and 150 °C for 1 h, compared with the pattern simulated from single-crystal X-ray data.

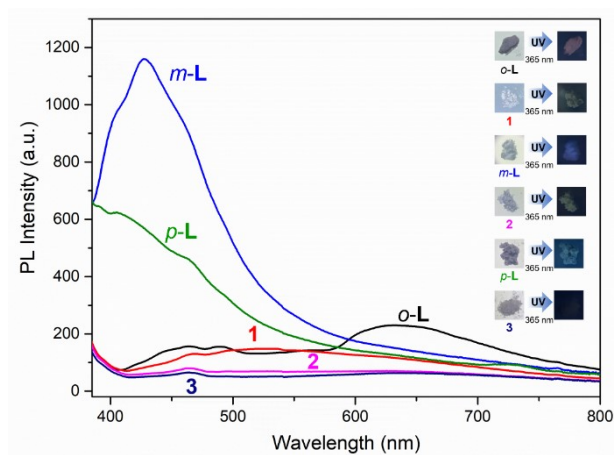

**Fig. S6** Solid-state photoluminescence emission spectra of *o*-L, complex **1**, *m*-L, complex **2**, *p*-L and complex **3** ( $\lambda_{\text{ex}}$  = 360 nm).

**Table S1** Crystal and experimental data for *o*-L, *m*-L and 1-3

|                                                                                      | <i>o</i> -L                                      | <i>m</i> -L                                      | 1                                                                  | 2                                                                  | 3                                                                  |
|--------------------------------------------------------------------------------------|--------------------------------------------------|--------------------------------------------------|--------------------------------------------------------------------|--------------------------------------------------------------------|--------------------------------------------------------------------|
| Formula                                                                              | C <sub>16</sub> H <sub>12</sub> N <sub>2</sub> S | C <sub>16</sub> H <sub>12</sub> N <sub>2</sub> S | C <sub>16</sub> H <sub>12</sub> AgBF <sub>4</sub> N <sub>2</sub> S | C <sub>16</sub> H <sub>12</sub> AgBF <sub>4</sub> N <sub>2</sub> S | C <sub>16</sub> H <sub>12</sub> AgBF <sub>4</sub> N <sub>2</sub> S |
| Formula weight                                                                       | 264.34                                           | 264.34                                           | 459.02                                                             | 459.02                                                             | 459.02                                                             |
| Temperature (K)                                                                      | 173(2)                                           | 173(2)                                           | 173(2)                                                             | 173(2)                                                             | 173(2)                                                             |
| Crystal system                                                                       | Triclinic                                        | Monoclinic                                       | Orthorhombic                                                       | Monoclinic                                                         | Triclinic                                                          |
| Space group                                                                          | <i>P</i> -1                                      | <i>C</i> 2/ <i>c</i>                             | <i>Pnma</i>                                                        | <i>P</i> 2 <sub>1</sub> / <i>m</i>                                 | <i>P</i> -1                                                        |
| <i>Z</i>                                                                             | 2                                                | 4                                                | 4                                                                  | 2                                                                  | 2                                                                  |
| <i>a</i> (Å)                                                                         | 7.7509(11)                                       | 15.5310(3)                                       | 7.101(16)                                                          | 7.0638(2)                                                          | 7.2026(3)                                                          |
| <i>b</i> (Å)                                                                         | 7.9064(10)                                       | 5.90210(10)                                      | 15.74(4)                                                           | 15.1751(6)                                                         | 8.0716(3)                                                          |
| <i>c</i> (Å)                                                                         | 11.7779(16)                                      | 14.9747(3)                                       | 14.51(3)                                                           | 7.7137(3)                                                          | 16.3023(7)                                                         |
| $\alpha$ (°)                                                                         | 73.163(6)                                        | 90                                               | 90                                                                 | 90                                                                 | 102.156(2)                                                         |
| $\beta$ (°)                                                                          | 84.391(7)                                        | 109.4350(10)                                     | 90                                                                 | 96.851(2)                                                          | 91.395(2)                                                          |
| $\gamma$ (°)                                                                         | 71.470(7)°                                       | 90                                               | 90                                                                 | 90                                                                 | 114.742(2)                                                         |
| <i>V</i> (Å <sup>3</sup> )                                                           | 655.00(15)                                       | 1294.45(4)                                       | 1622(6)                                                            | 820.96(5)                                                          | 834.68(6)                                                          |
| <i>D</i> <sub>x</sub> (g cm <sup>-3</sup> )                                          | 1.340                                            | 1.356                                            | 1.880                                                              | 1.857                                                              | 1.826                                                              |
| 2 $\theta$ <sub>max</sub> (°)                                                        | 54                                               | 56                                               | 50                                                                 | 57                                                                 | 56                                                                 |
| <i>R</i> <sub>1</sub> , <i>wR</i> <sub>2</sub> [ <i>I</i> > 2 $\sigma$ ( <i>I</i> )] | 0.0651, 0.1547                                   | 0.0328, 0.0839                                   | 0.0415, 0.1105                                                     | 0.0342, 0.0784                                                     | 0.0244, 0.0639                                                     |
| <i>R</i> <sub>1</sub> , <i>wR</i> <sub>2</sub> [all data]                            | 0.1034, 0.1756                                   | 0.0365, 0.0869                                   | 0.0533, 0.1187                                                     | 0.0417, 0.0823                                                     | 0.0271, 0.0651                                                     |
| Data / restraints / parameters                                                       | 2864 / 0 / 172                                   | 1558 / 0 / 87                                    | 2117 / 0 / 121                                                     | 2133 / 0 / 131                                                     | 4026 / 0 / 226                                                     |
| Goodness-of-fit on <i>F</i> <sup>2</sup>                                             | 1.000                                            | 1.079                                            | 1.062                                                              | 1.045                                                              | 1.069                                                              |
| No. of reflection used<br>[>2 $\sigma$ ( <i>I</i> )]                                 | 2864 [ <i>R</i> <sub>int</sub> =<br>=0.0809]     | 1558 [ <i>R</i> <sub>int</sub> =<br>0.0297]      | 2117 [ <i>R</i> <sub>int</sub> =<br>0.0504]                        | 2133 [ <i>R</i> <sub>int</sub> =<br>0.0399]                        | 4026 [ <i>R</i> <sub>int</sub> =<br>0.0428]                        |
| Structure determination                                                              | SHELXTL                                          | SHELXTL                                          | SHELXTL                                                            | SHELXTL                                                            | SHELXTL                                                            |
| Refinement                                                                           | full-matrix                                      | full-matrix                                      | full-matrix                                                        | full-matrix                                                        | full-matrix                                                        |

**Table S2** Selected bond lengths (Å) and bond angles (°) for **1**

|            |          |            |          |
|------------|----------|------------|----------|
| Ag1-N1     | 2.276(5) | Ag1-S1B    | 2.446(5) |
| N1A-Ag1-N1 | 106.6(2) | N1-Ag1-S1B | 126.1(1) |

<sup>a</sup>Symmetry operations: (A)  $x, -y+1.5, z$  (B)  $x+1, y, z$

**Table S3** Selected bond lengths (Å) and bond angles (°) for **2<sup>a</sup>**

|             |          |            |          |
|-------------|----------|------------|----------|
| Ag1-N1A     | 2.249(2) | Ag1-N2B    | 2.249(2) |
| Ag1-S1      | 2.427(1) |            |          |
| N1A-Ag1-N2B | 97.0(1)  | N2B-Ag1-S1 | 131.5(1) |
| N1A-Ag1-S1  | 131.5(1) |            |          |

<sup>a</sup>Symmetry operations: (A)  $x, -y+0.5, z$  (B)  $-x, -y+1, -z+1$  (C)  $x, -y+1.5, z$

**Table S4** Selected bond lengths (Å) and bond angles (°) for **3<sup>a</sup>**

|             |          |            |          |
|-------------|----------|------------|----------|
| Ag1-N2A     | 2.216(2) | Ag1-S1     | 2.485(1) |
| Ag1-N1B     | 2.293(2) | Ag1-F1     | 2.654(2) |
| N2A-Ag1-N1B | 109.7(1) | N2A-Ag1-F1 | 114.3(1) |
| N2A-Ag1-S1  | 128.1(1) | N1B-Ag1-F1 | 83.3(1)  |
| N1B-Ag1-S1  | 115.2(1) | S1-Ag1-F1  | 95.8(1)  |

<sup>a</sup>Symmetry operations: (A)  $-x+2, -y+2, -z+2$  (B)  $-x+2, -y+1, -z+1$
